# Supplementary material for: Ellagitannin, Phenols, and Flavonoids as Antibacterials from Acalypha arvensis (Euphorbiaceae)
Source: MDPI journal article supplement (doi:10.3390/plants11030300), 2022-01-24
Supplement: s1 [file s1]

## Article

# Ellagitannin, Phenols, and Flavonoids as Antibacterials from *Acalypha arvensis* (Euphorbiaceae)

Ever A. Ble-González <sup>1,\*</sup>, Abraham Gómez-Rivera <sup>1</sup>, Alejandro Zamilpa <sup>2</sup>, Ricardo López-Rodríguez <sup>1</sup>, Carlos Ernesto Lobato-García <sup>1</sup>, Patricia Álvarez-Fitz <sup>3</sup>, Ana Silvia Gutierrez-Roman <sup>2</sup>, Ma Dolores Perez-García <sup>2</sup>, Alejandro Bugarin <sup>4</sup> and Manasés González-Cortazar <sup>2,\*</sup>

<sup>1</sup> División Académica de Ciencias Básicas, Universidad Juárez Autónoma de Tabasco, Carretera Cunduacán-Jalpa Km. 0.5, Cunduacán Tabasco 86690, Mexico; abgori@gmail.com (A.G.-R.); ricardo.lopezr@ujat.mx (R.L.-R.); carlos.lobato@ujat.mx (C.E.L.-G.)

<sup>2</sup> Centro de Investigación Biomédica del Sur, Instituto Mexicano del Seguro Social, Argentina No. 1, Col. Centro, Xochitepec, Morelos 62790, Mexico; azamilpa\_2000@yahoo.com.mx (A.Z.); 12gtr.ana@gmail.com (A.S.G.-R.); lola\_as@yahoo.com.mx (M.D.P.-G.)

<sup>3</sup> Cátedra CONACyT-Universidad Autónoma de Guerrero, Av. Lázaro Cárdenas s/n. Col. La Haciendita, Chilpancingo, Guerrero 39070, Mexico; paty\_fit@hotmail.com

<sup>4</sup> Department of Chemistry and Physics, Florida Gulf Coast University, Fort Myers, FL 33965, USA; abugarin@fgcu.edu

\* Correspondence: ble\_49@hotmail.com (E.A.B.-G.); gmanases2000@gmail.com (M.G.-C.); Tel.: +52-(993)-581-500 (ext. 4711) (E.A.B.-G.); +52-(777)-3612-155 (M.G.-C.)

**Keywords:** *Acalypha arvensis*; ellagitannin; corilagin; *Staphylococcus aureus*; flavonoids; antibacterial

**Citation:** Ble-González, E.A.; Gómez-Rivera, A.; Zamilpa, A.; López-Rodríguez, R.; Lobato-García, C.E.; Álvarez-Fitz, P.; Gutierrez-Roman, A.S.; Perez-García, M.D.; Bugarin, A.; González-Cortazar, M. Ellagitannin, Phenols, and Flavonoids as Antibacterials from *Acalypha arvensis* (Euphorbiaceae). *Plants* **2022**, *11*, 300. <https://doi.org/10.3390/plants11030300>

Academic Editors: Juei-Tang Cheng, I-Min Liu and Szu-Chuan Shen

Received: 13 December 2021

Accepted: 13 January 2022

Published: 24 January 2022

**Publisher's Note:** MDPI stays neutral with regard to jurisdictional claims in published maps and institutional affiliations.

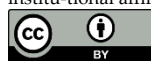

**Copyright:** © 2022 by the authors. Submitted for possible open access publication under the terms and conditions of the Creative Commons Attribution (CC BY) license (<http://creativecommons.org/licenses/by/4.0/>).

## Contents

### Figure caption.

**Figure S1.** Chemical structure, HPLC chromatogram and UV light spectrum of corilagin (1)

**Figure S2.** <sup>1</sup>H-NMR (CD<sub>3</sub>OD, 600 MHz) of corilagin (1).

**Figure S3.** <sup>13</sup>C-NMR (CD<sub>3</sub>OD, 150 MHz) of corilagin (1)

**Figure S4.** <sup>13</sup>C-DEPT-NMR (CD<sub>3</sub>OD, 150 MHz) of corilagin (1)

**Figure S5.** <sup>1</sup>H-<sup>1</sup>H(COSY)-NMR (CD<sub>3</sub>OD, 600 MHz) of corilagin (1)

**Figure S6.** <sup>1</sup>H-<sup>13</sup>C(HSQC)-NMR (CD<sub>3</sub>OD, 600 MHz for <sup>1</sup>H and 150 MHz for <sup>13</sup>C) of corilagin (1)

**Figure S7.** <sup>1</sup>H-<sup>13</sup>C(HMBC)-NMR (CD<sub>3</sub>OD, 600 MHz for <sup>1</sup>H and 150 MHz for <sup>13</sup>C) of corilagin (1)

**Figure S8.** <sup>1</sup>H-NMR (CD<sub>3</sub>OD, 600 MHz) of the mixture of compounds (6-8).

**Figure S9.** <sup>13</sup>C-NMR (CD<sub>3</sub>OD, 150 MHz) of the mixture of compounds (6-8).

**Figure S10.** <sup>13</sup>C-DEPT-NMR (CD<sub>3</sub>OD, 150 MHz) of the mixture of compounds (6-8).

**Figure S11.** <sup>1</sup>H-<sup>1</sup>H(COSY)-NMR (CD<sub>3</sub>OD, 600 MHz) of the mixture of compounds (6-8).

**Figure S12.** <sup>1</sup>H-<sup>13</sup>C(HSQC)-NMR (CD<sub>3</sub>OD, 600 MHz) of the mixture of compounds (6-8).

**Figure S13.** <sup>1</sup>H-<sup>13</sup>C(HMBC)-NMR (CD<sub>3</sub>OD, 600 MHz) of the mixture of compounds (6-8).

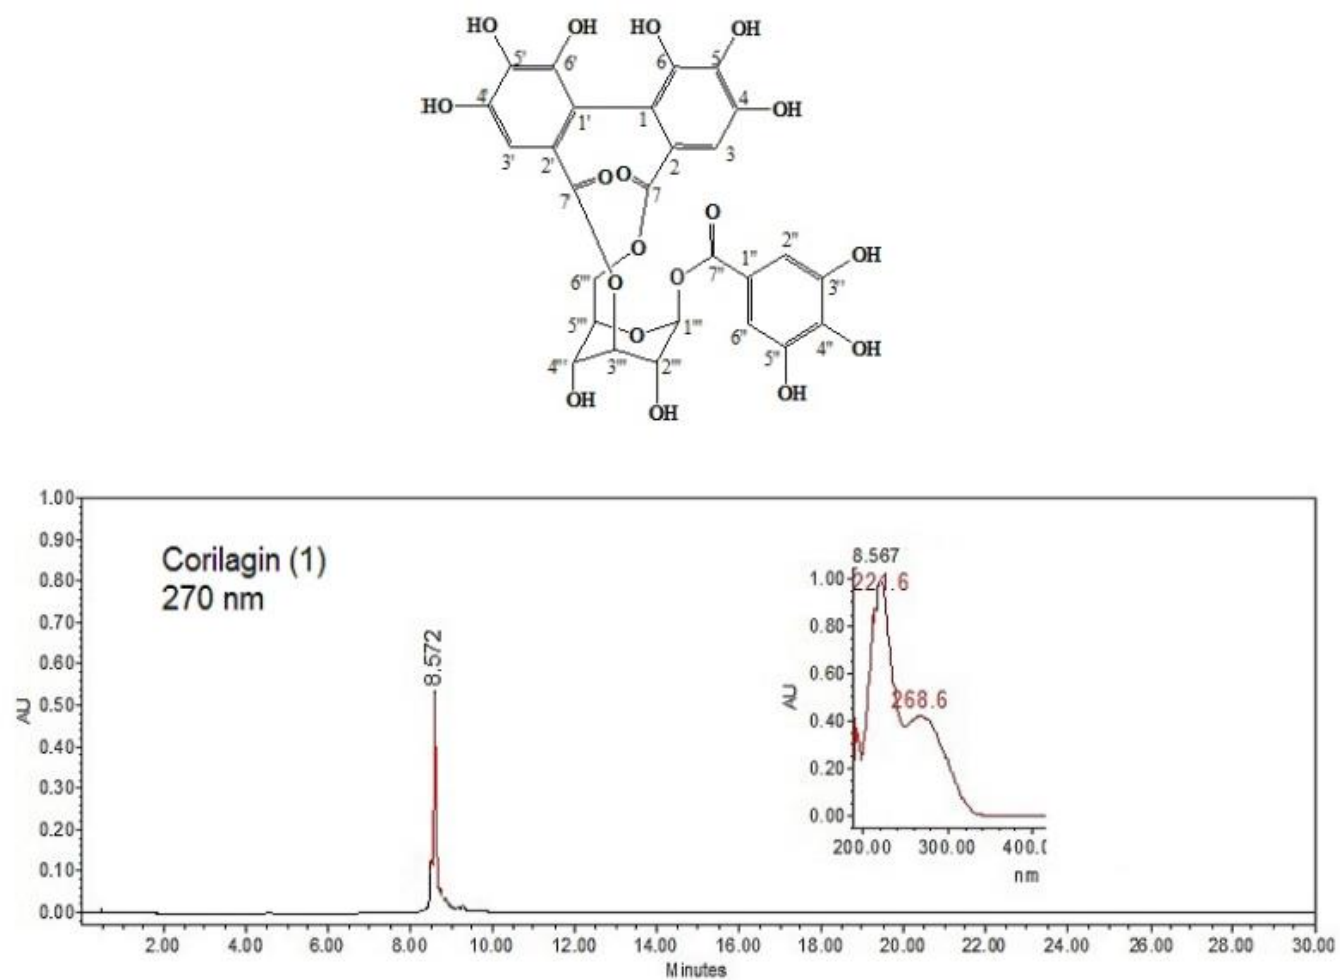

Figure S1. Chemical structure, HPLC chromatogram and UV light spectrum of corilagin (1).

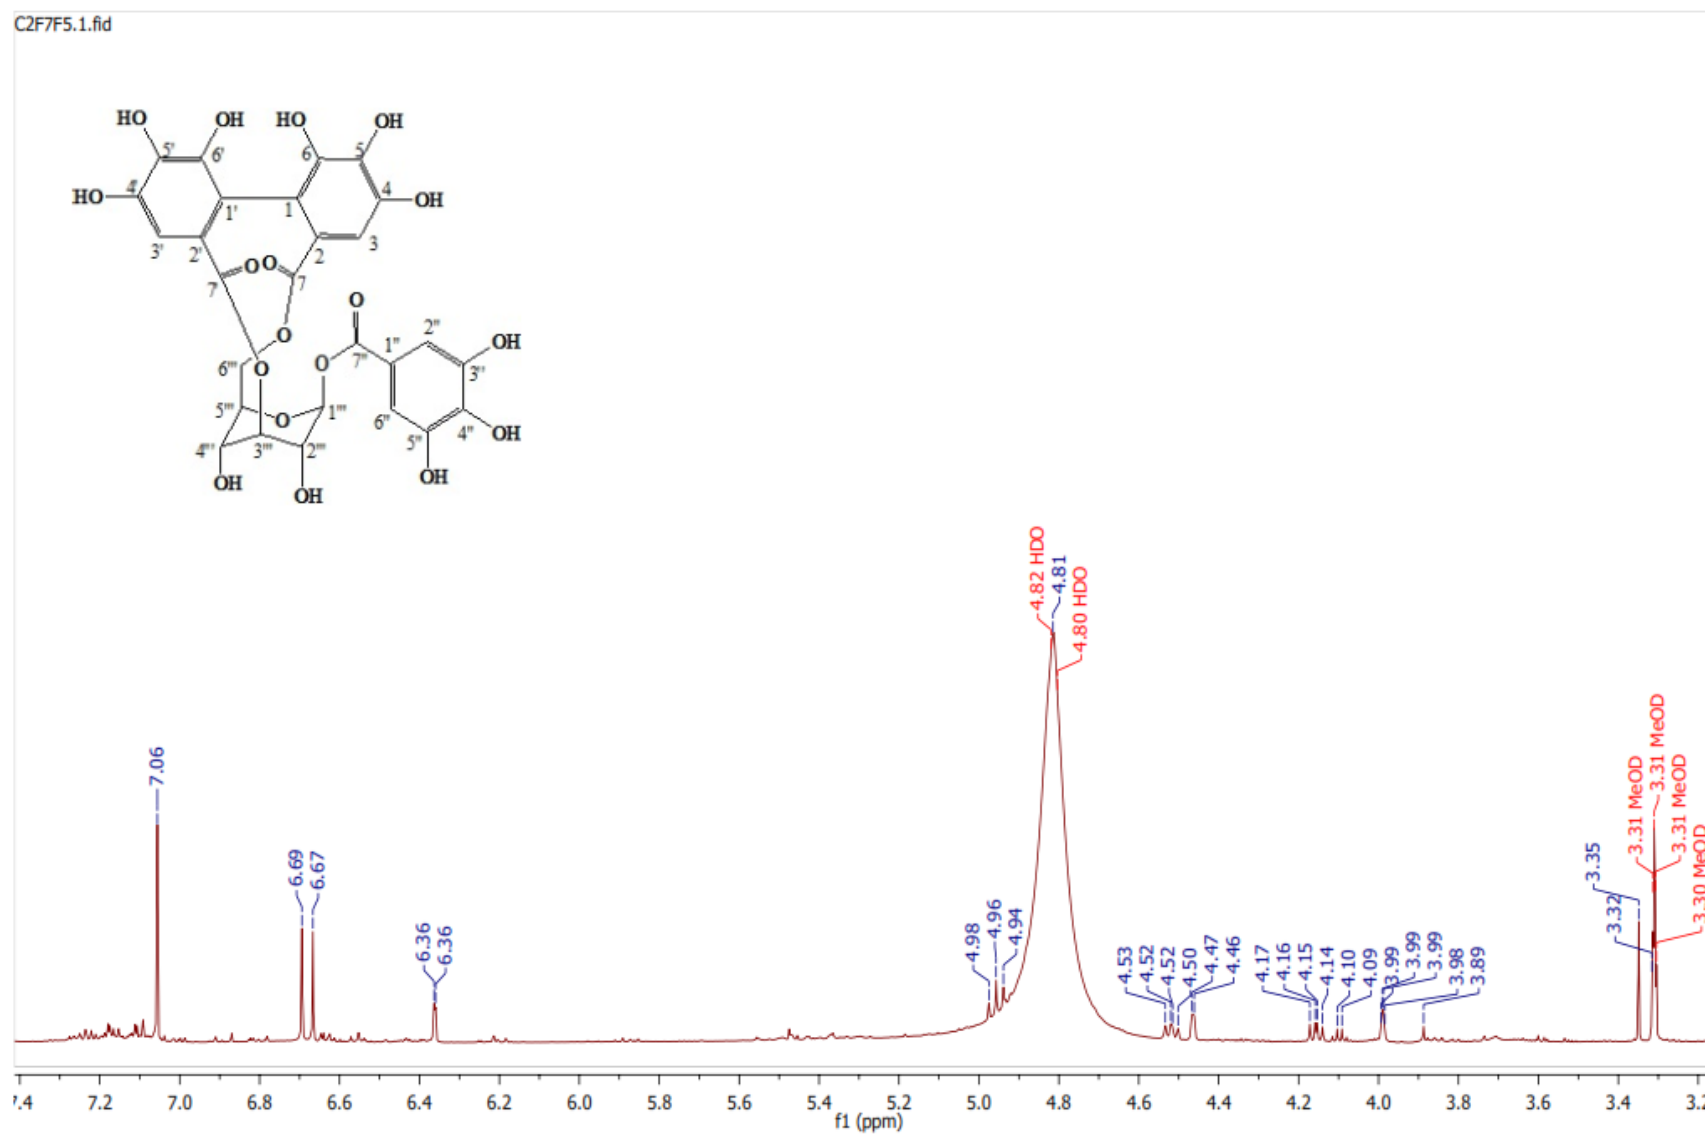

Figure S2.  $^1\text{H}$ -NMR (CD<sub>3</sub>OD, 600 MHz) of corilagin (1).

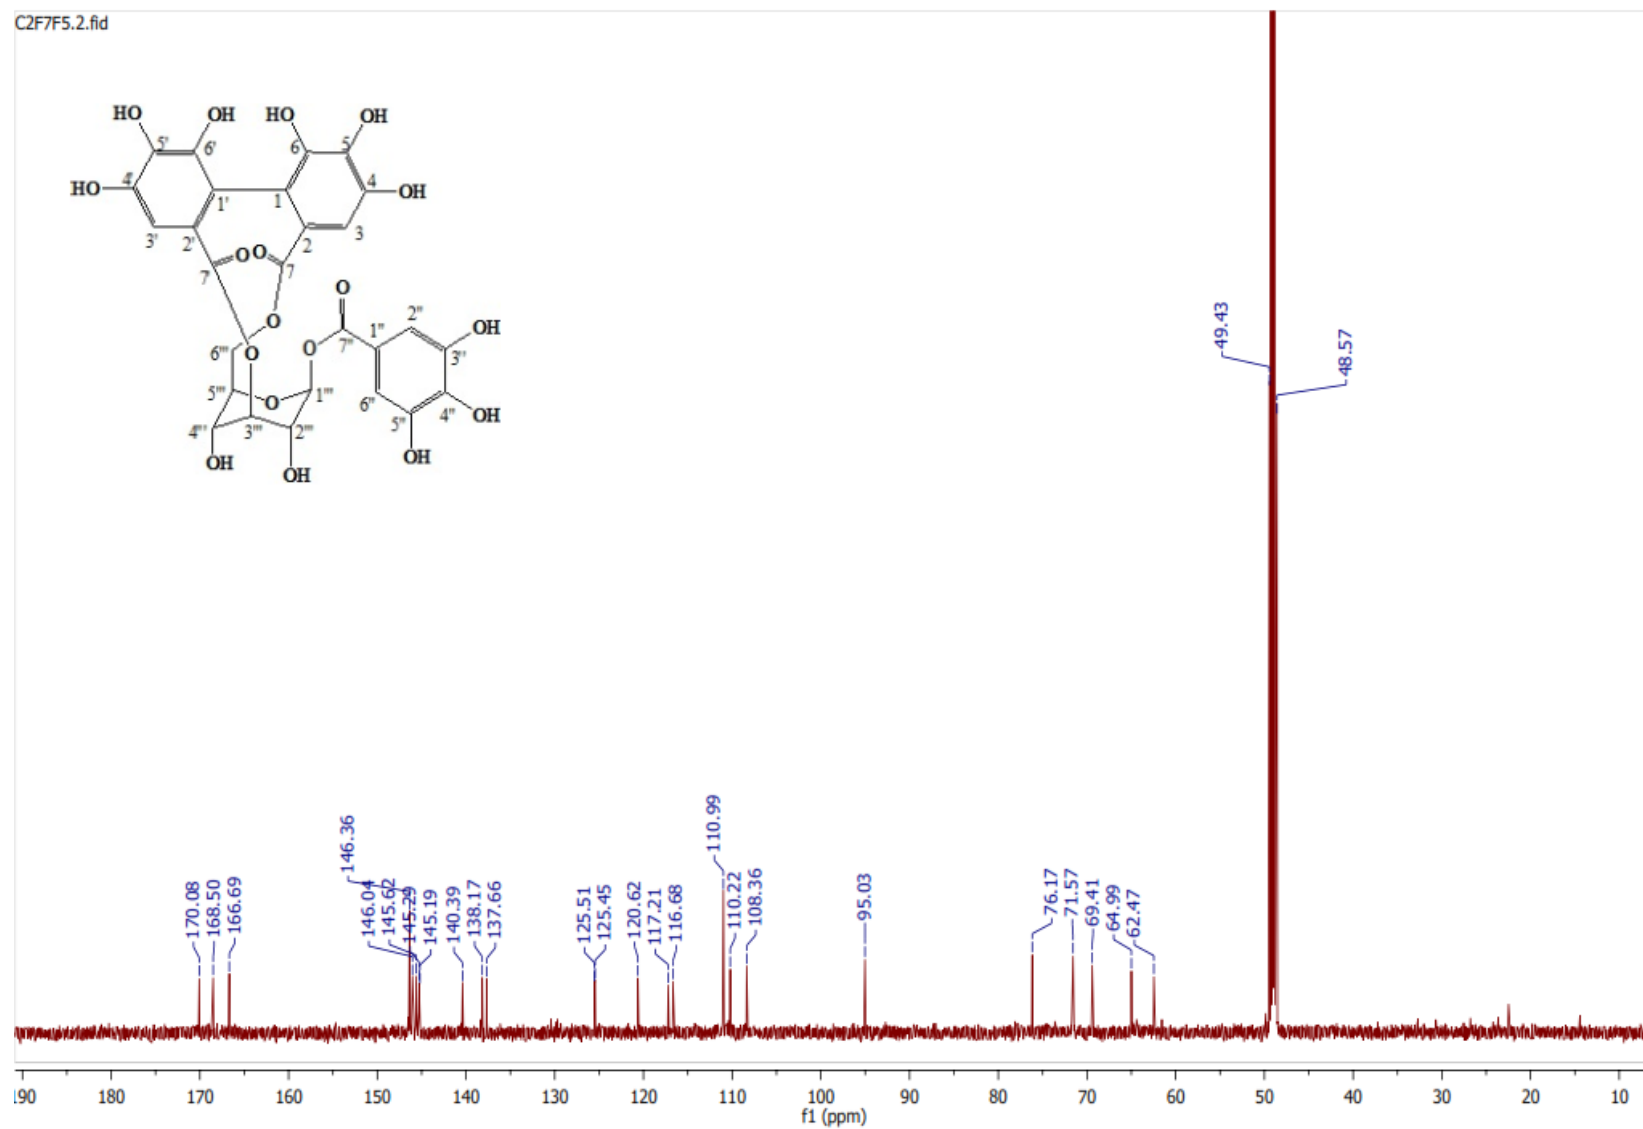

Figure S3. <sup>13</sup>C-NMR (CD<sub>3</sub>OD, 150 MHz) of corilagin (1).

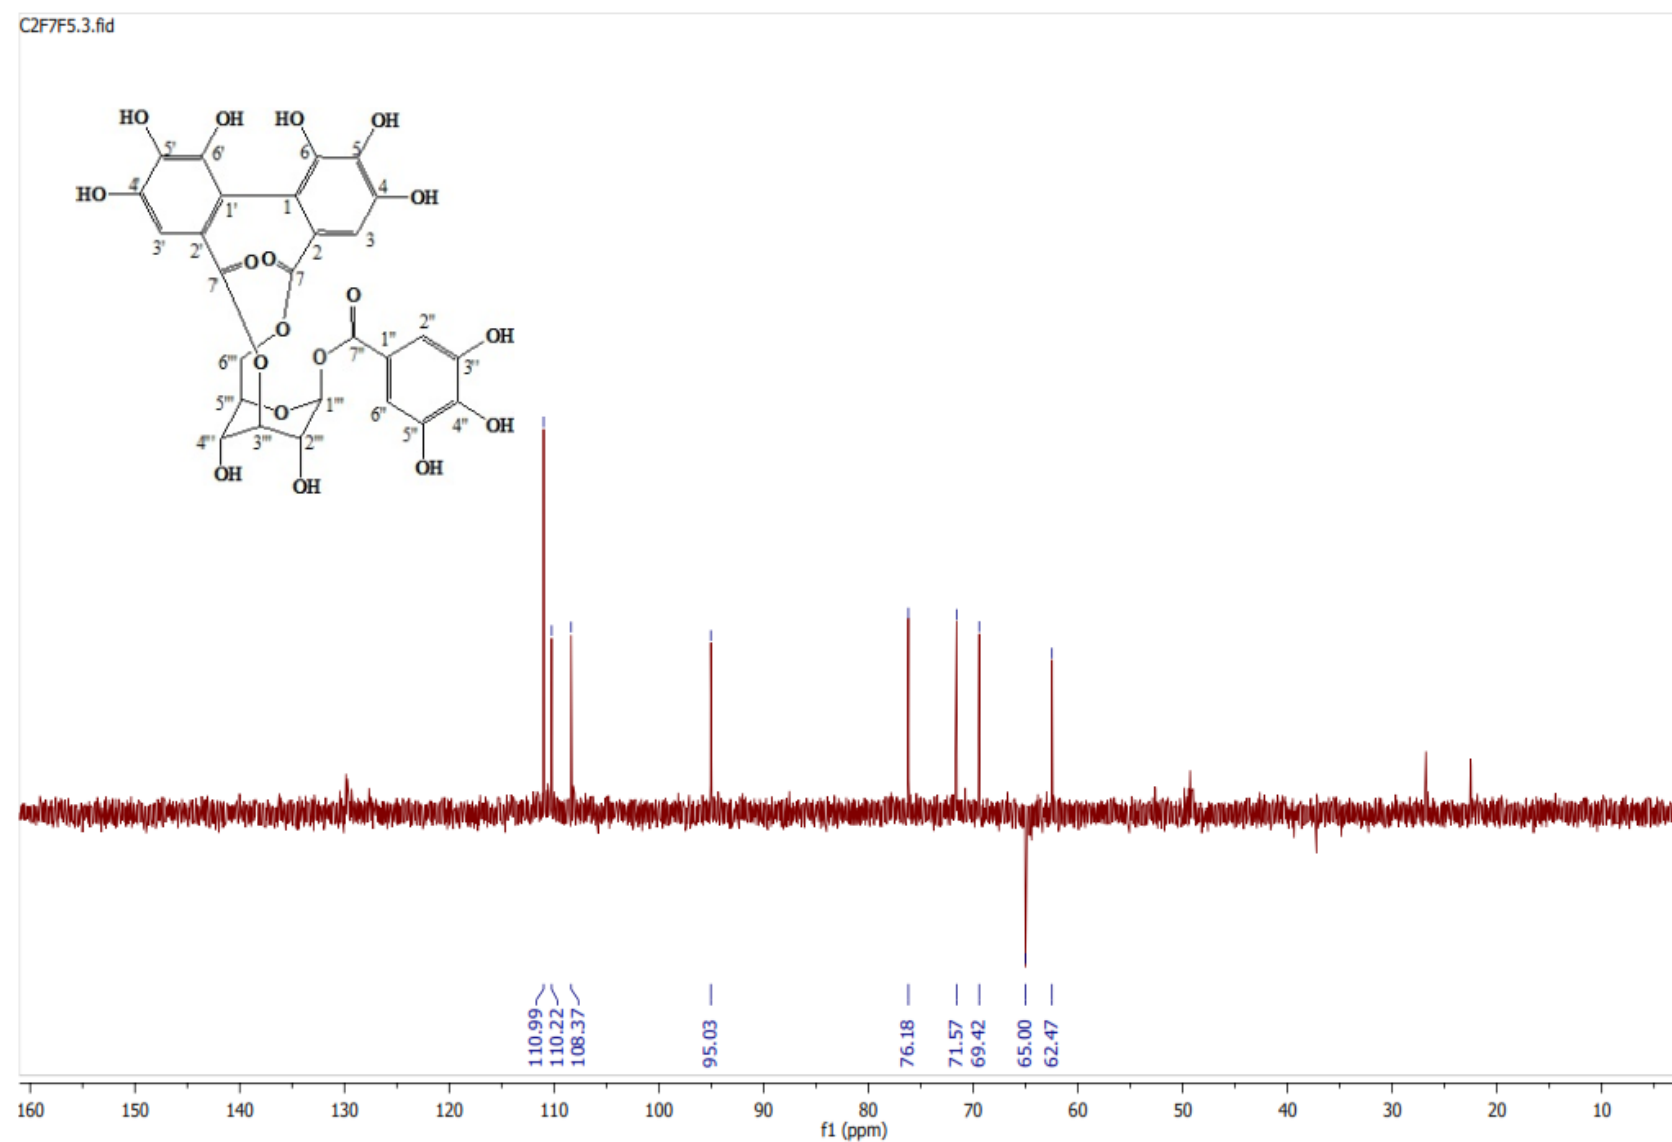

Figure S4.  $^{13}\text{C}$ -DEPT NMR ( $\text{CD}_3\text{OD}$ , 150 MHz) of corilagin (1)

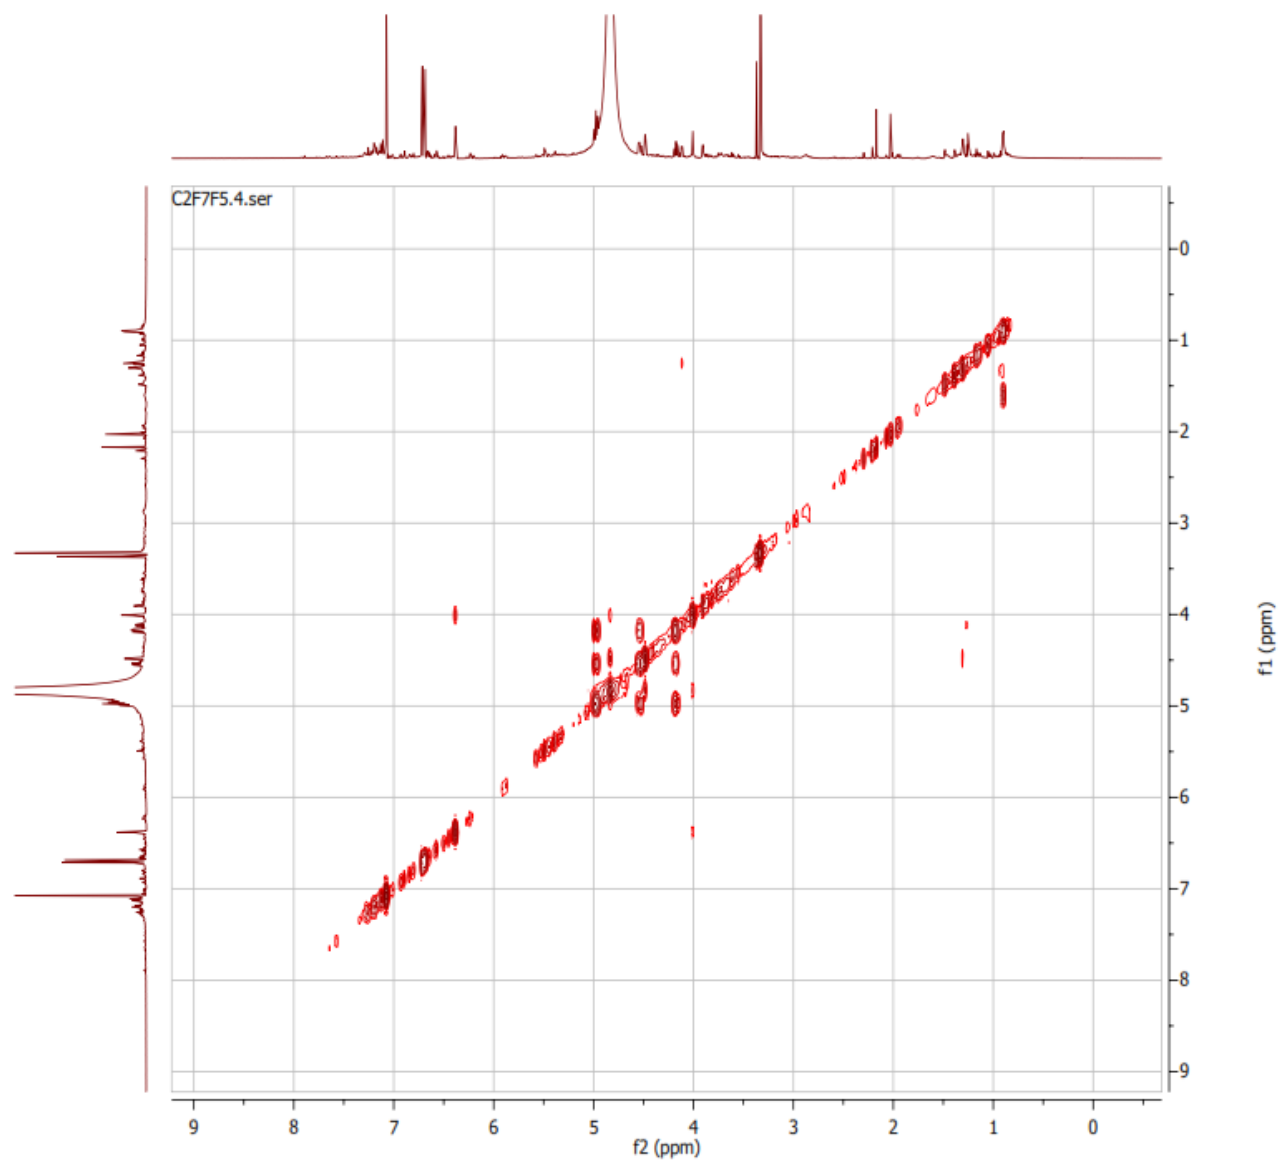

Figure S5.  $^1\text{H}$ - $^1\text{H}$  (COSY) NMR ( $\text{CD}_3\text{OD}$ , 600 MHz) of corilagin (1)

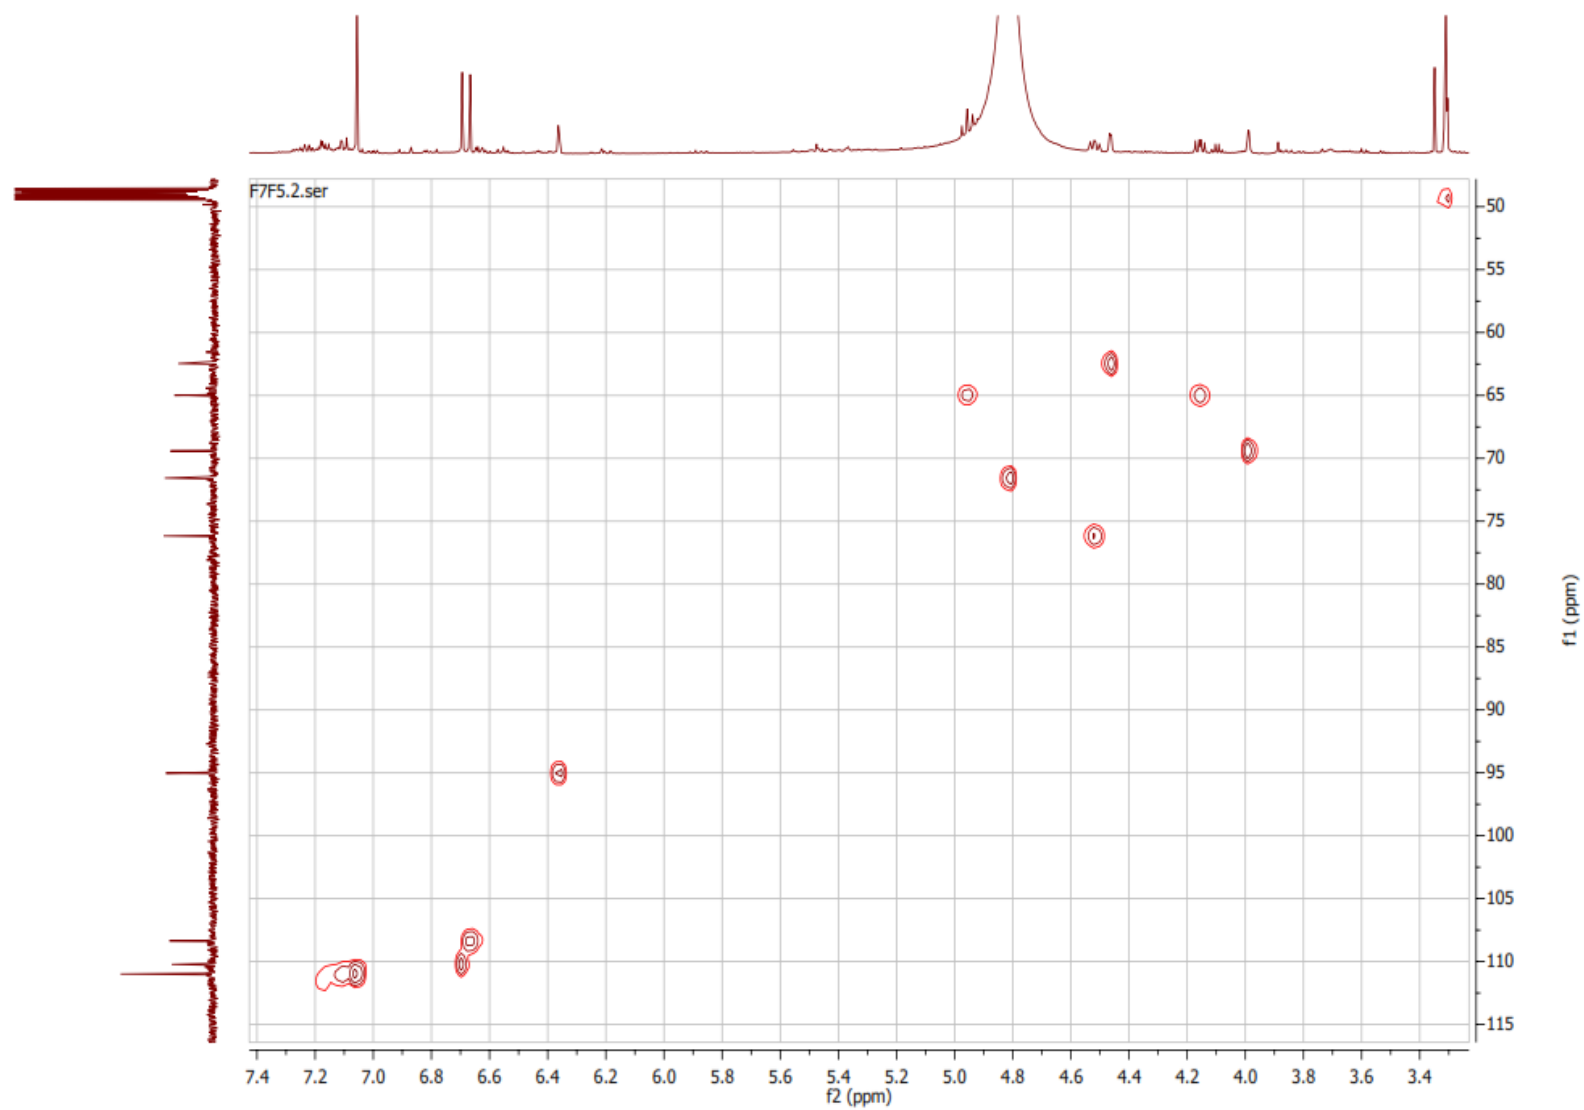

Figure S6.  $^1\text{H}$ - $^{13}\text{C}$  (HSQC) NMR ( $\text{CD}_3\text{OD}$ , 600 MHz) of corilagin (1)

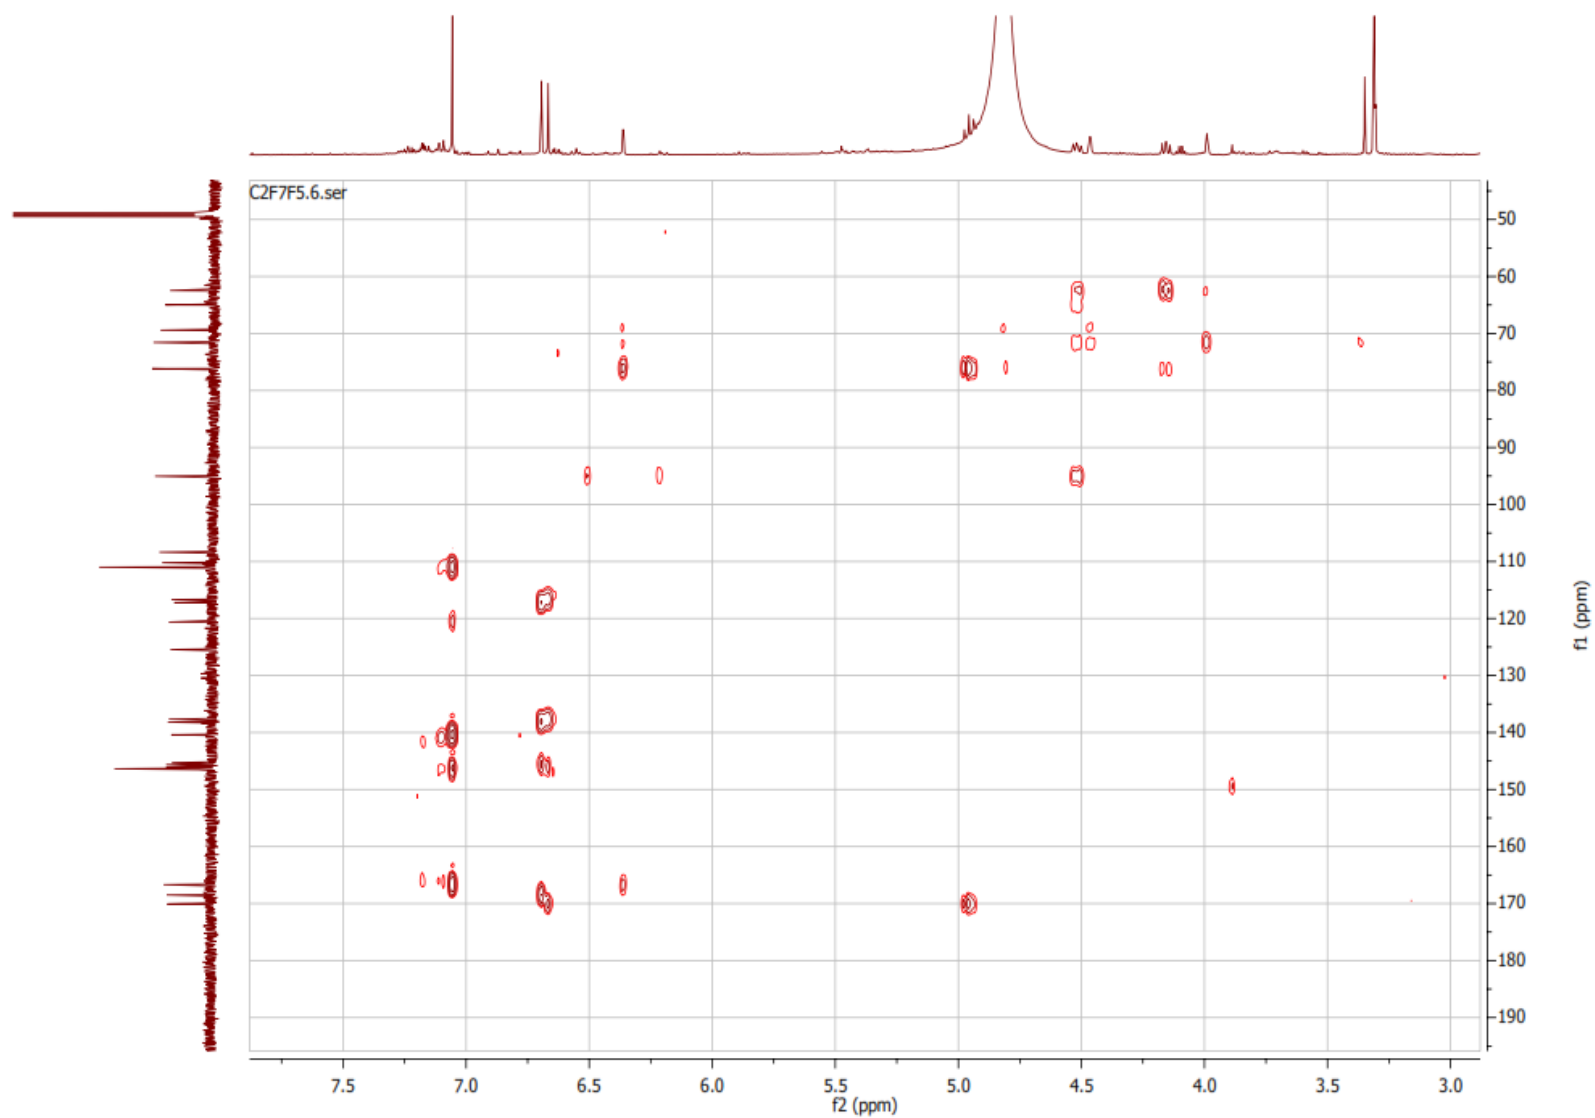

Figure S7.  $^1\text{H}$ - $^{13}\text{C}$  (HMBC) NMR ( $\text{CD}_3\text{OD}$ , 600 MHz) of corilagin (1)



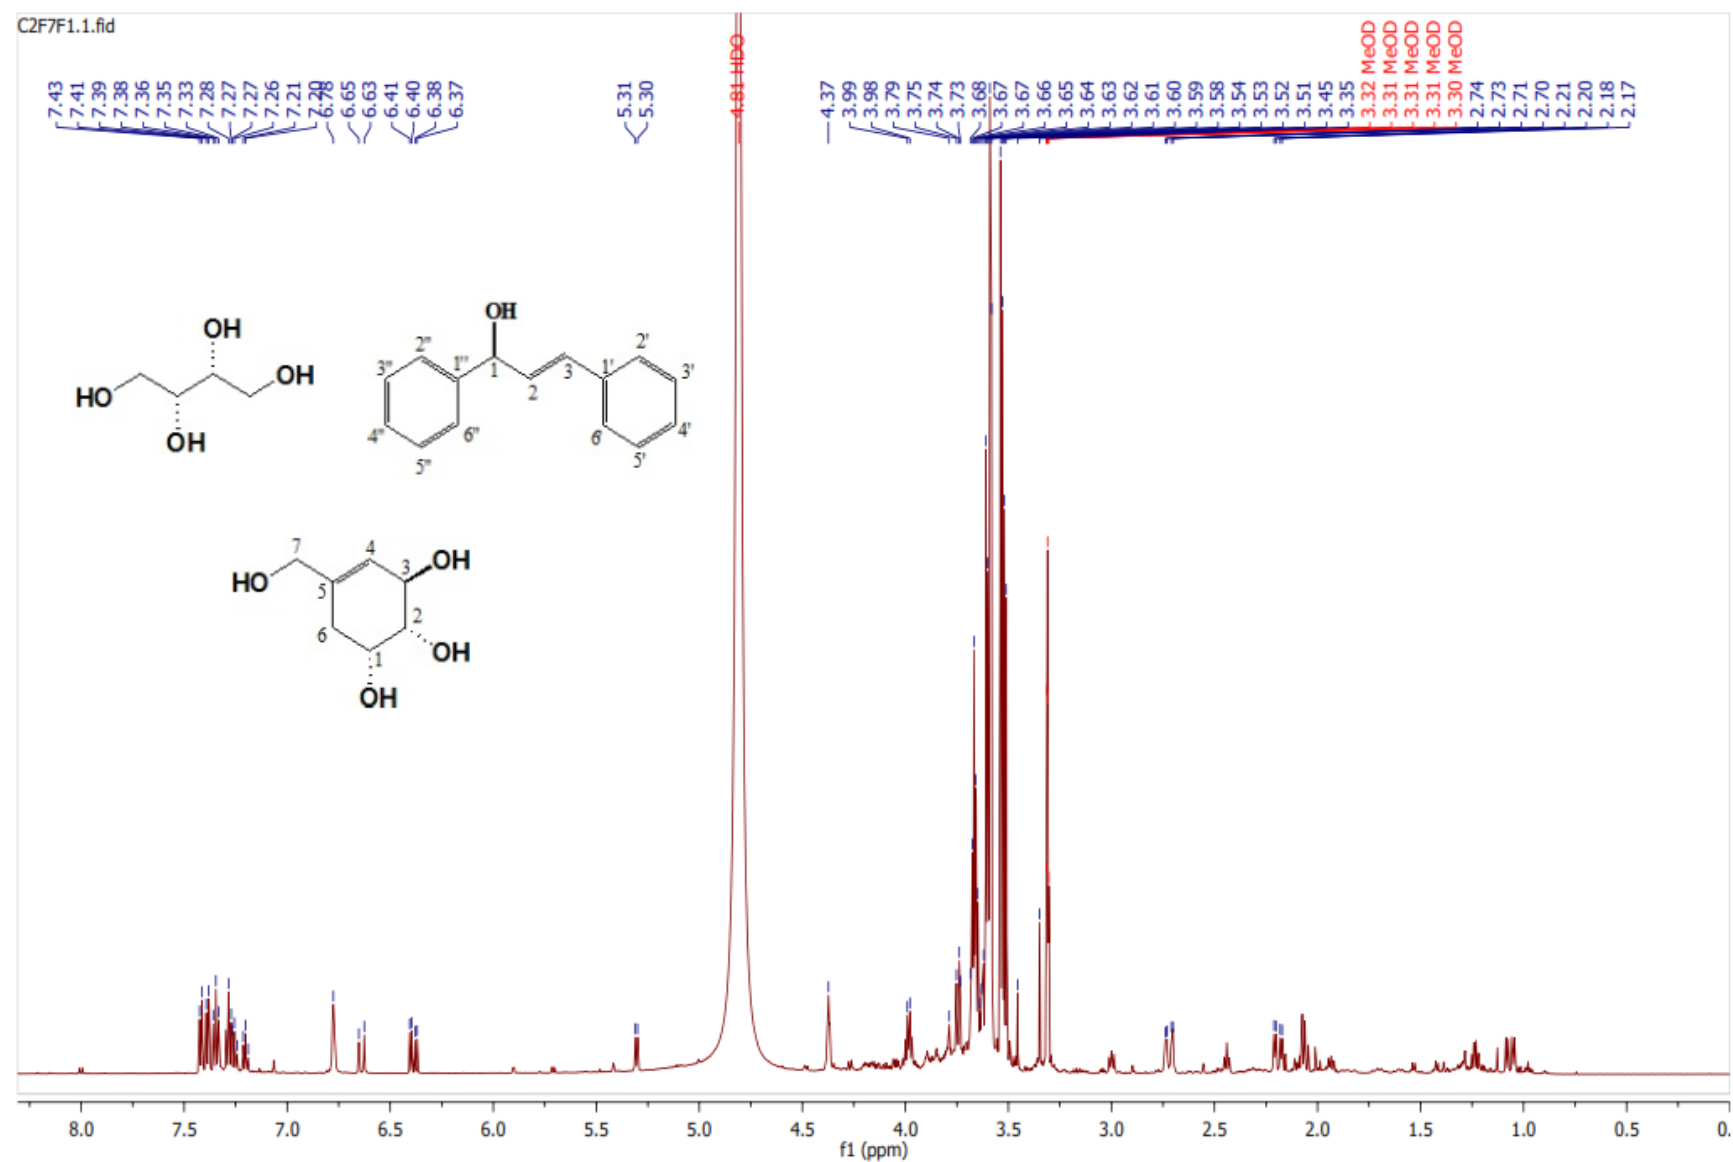

Figure S8.  $^1\text{H}$ -NMR ( $\text{CD}_3\text{OD}$ , 600 MHz) of the mixture of compounds (6-8).

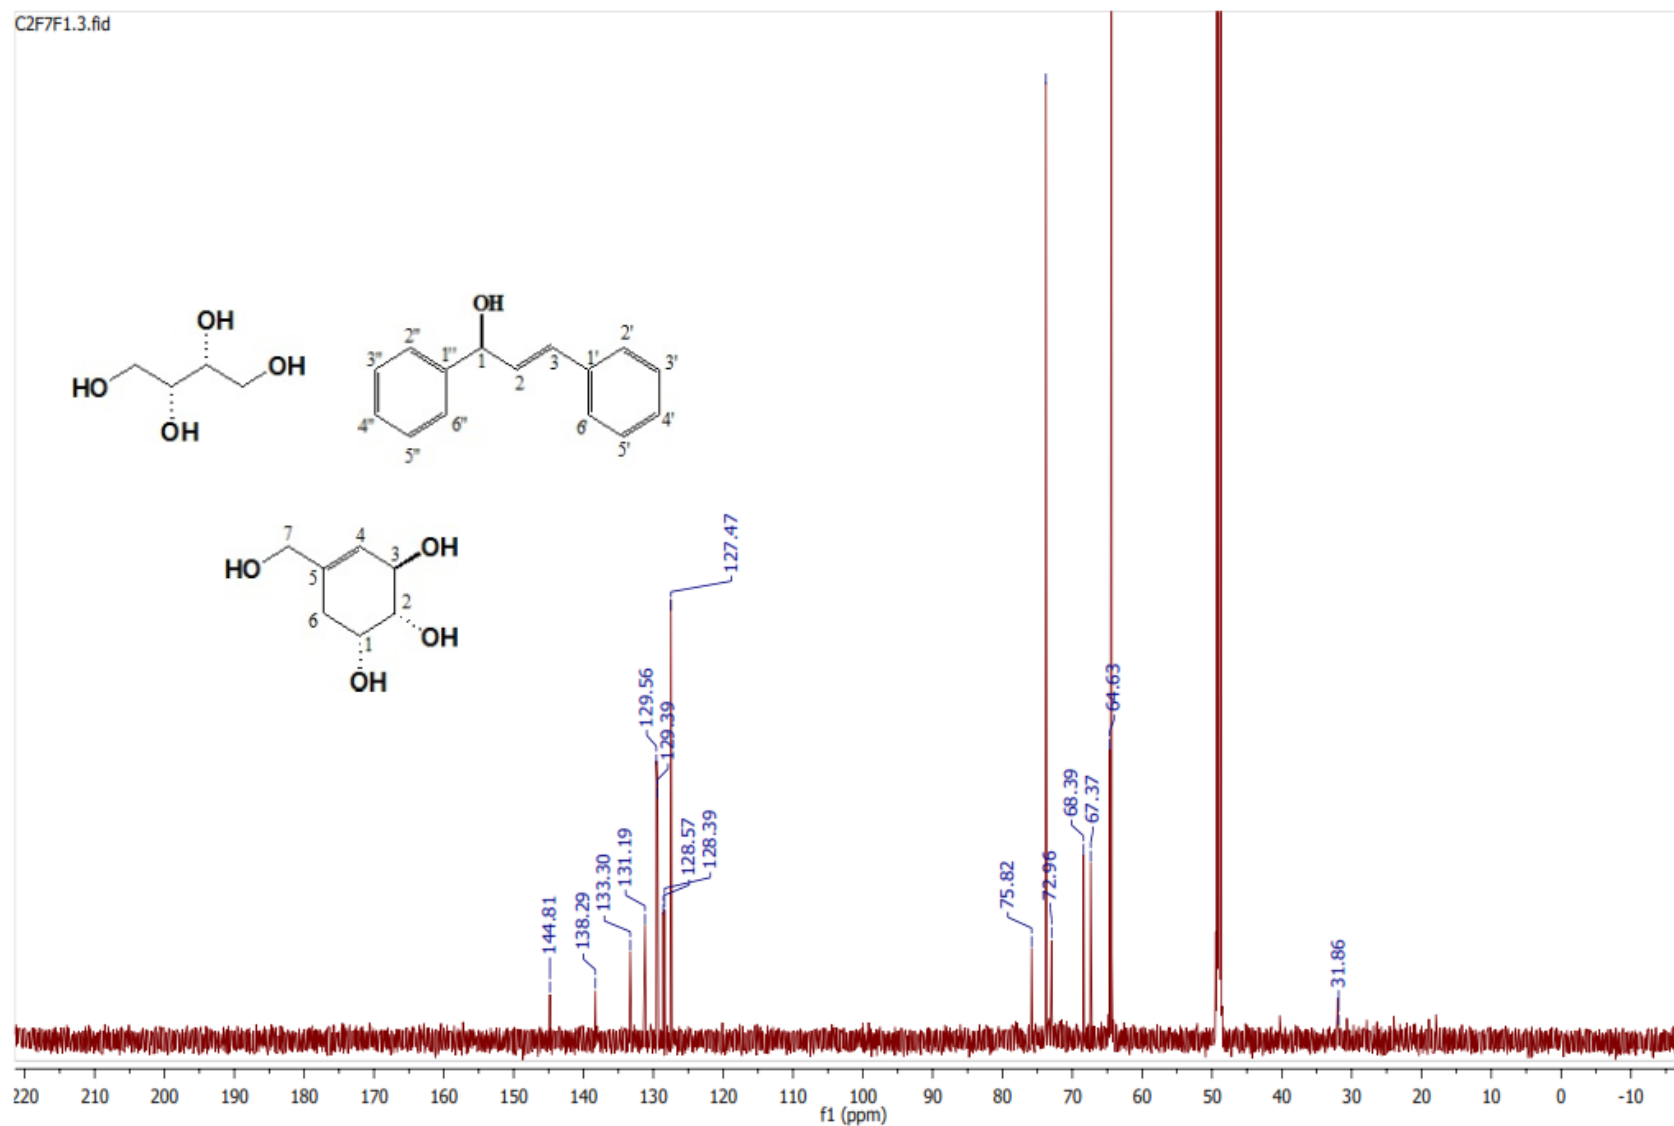

Figure S9. <sup>13</sup>C-NMR (CD<sub>3</sub>OD, 150 MHz) of the mixture of compounds (6-8).

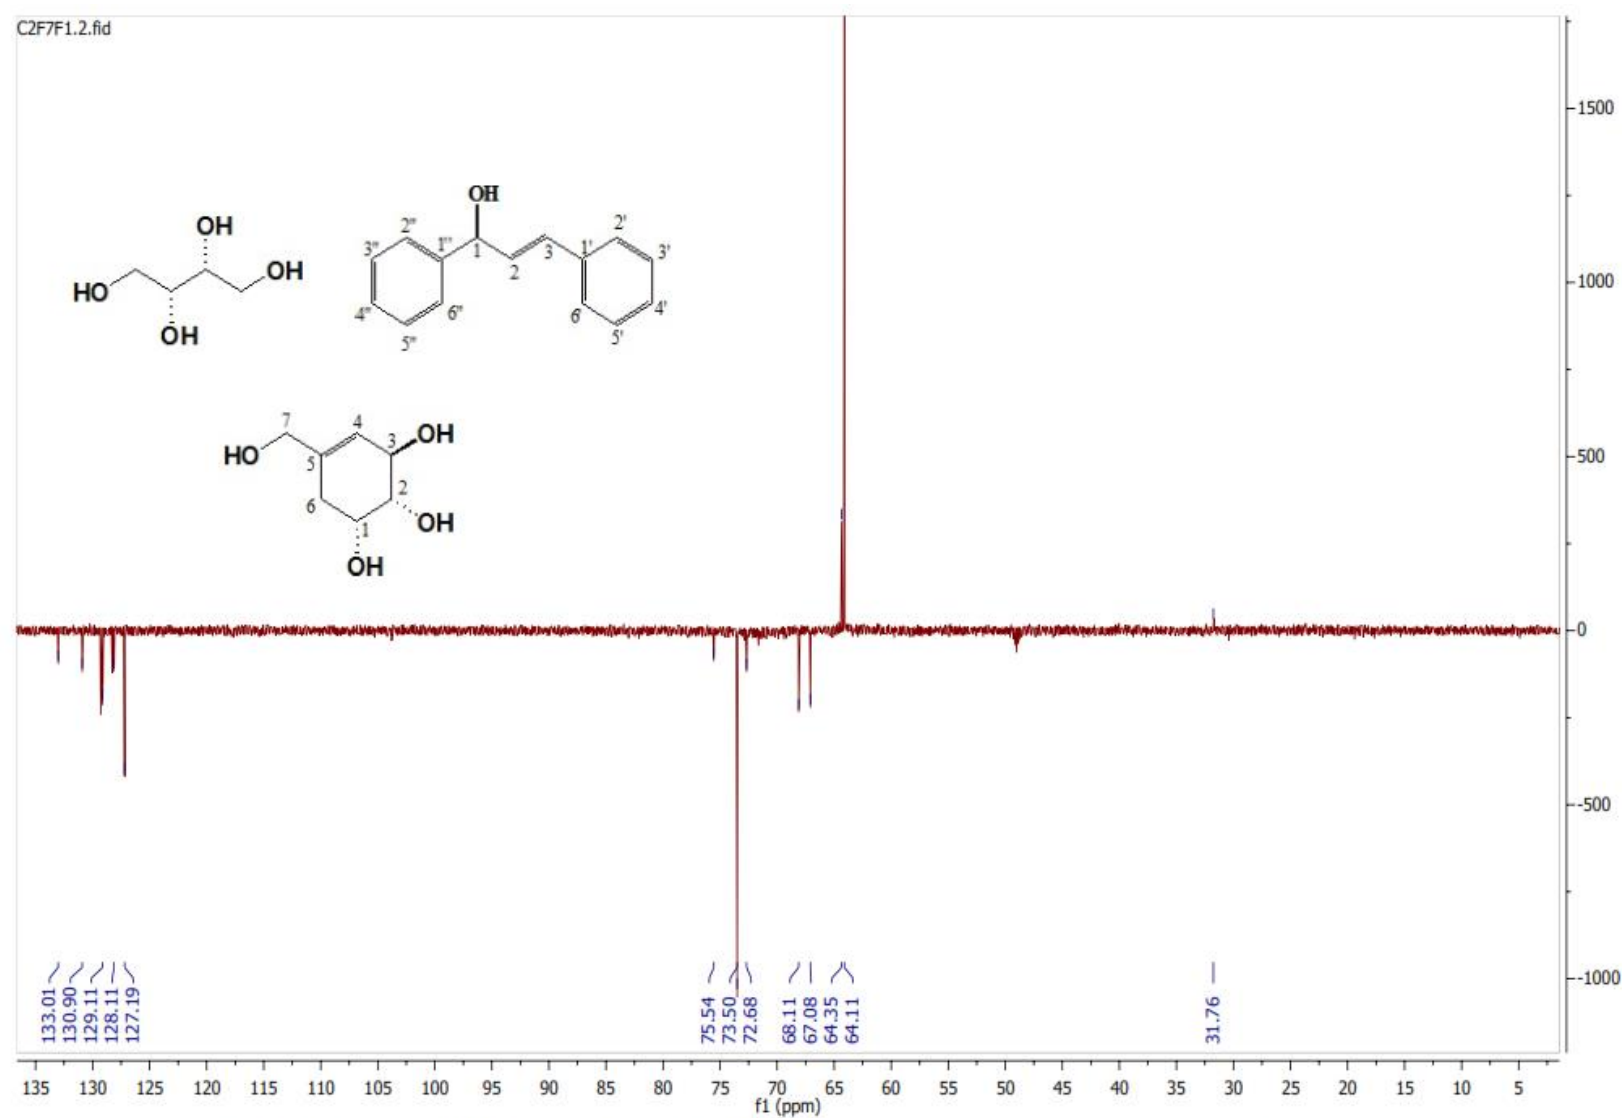

Figure S10.  $^{13}\text{C}$ -DEPT NMR ( $\text{CD}_3\text{OD}$ , 150 MHz) of the mixture of compounds (6-8).

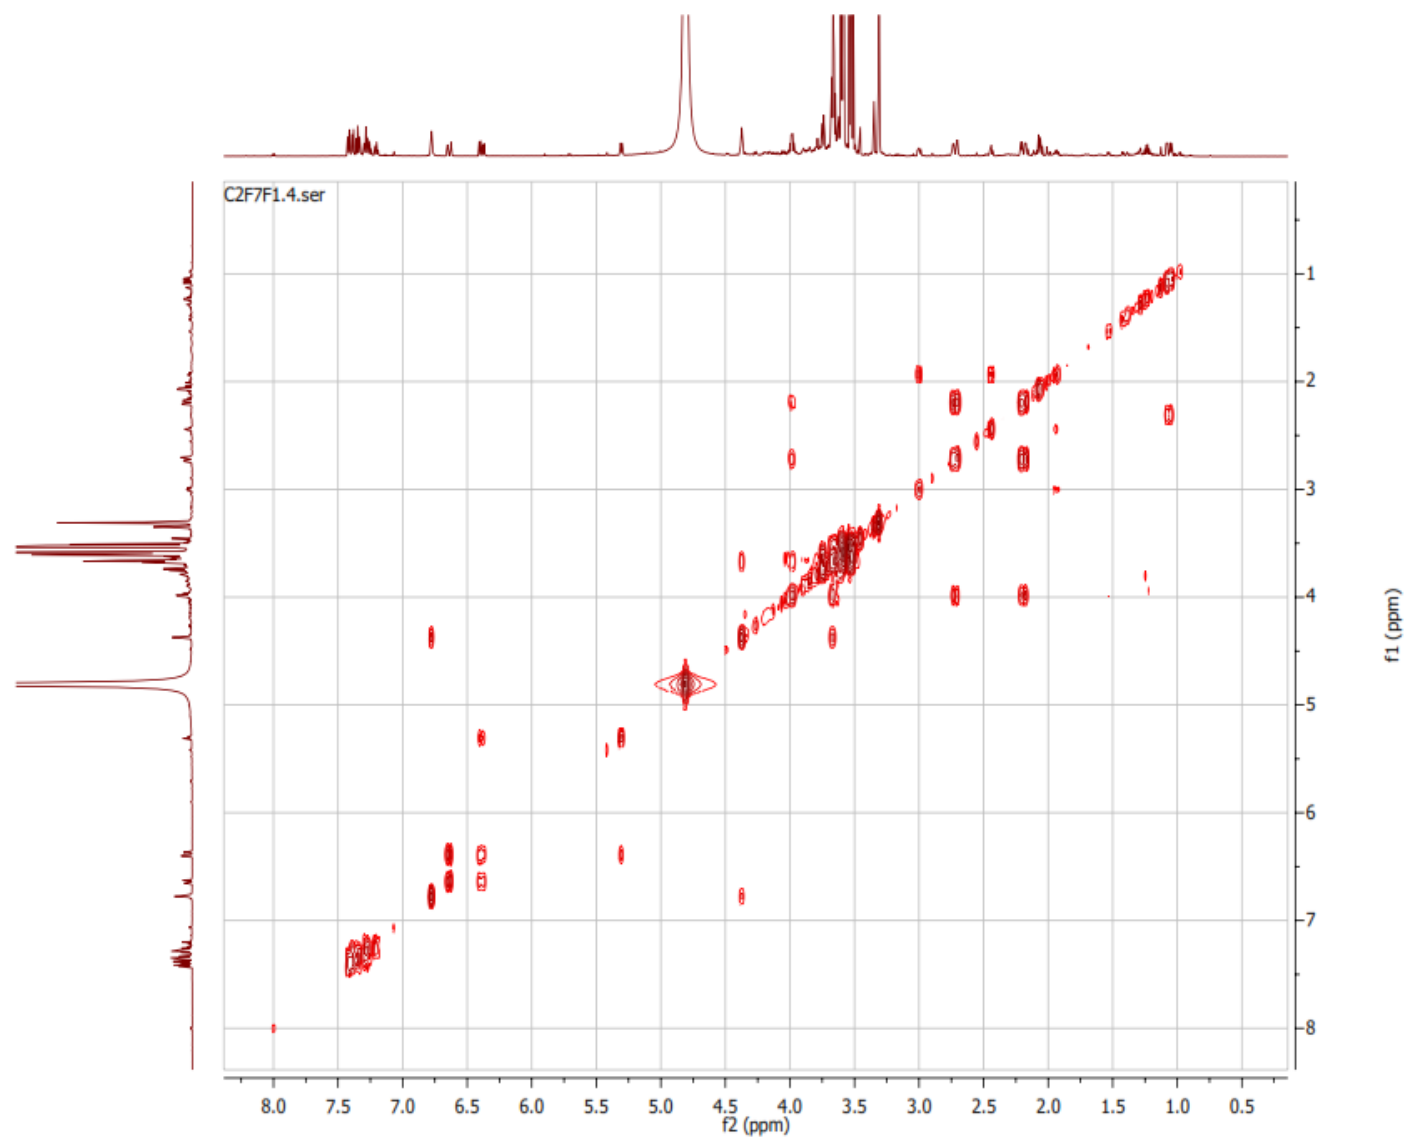

Figure S11.  $^1\text{H}$ - $^1\text{H}$  (COSY) NMR ( $\text{CD}_3\text{OD}$ , 600 MHz) of the mixture of compounds (**6-8**).

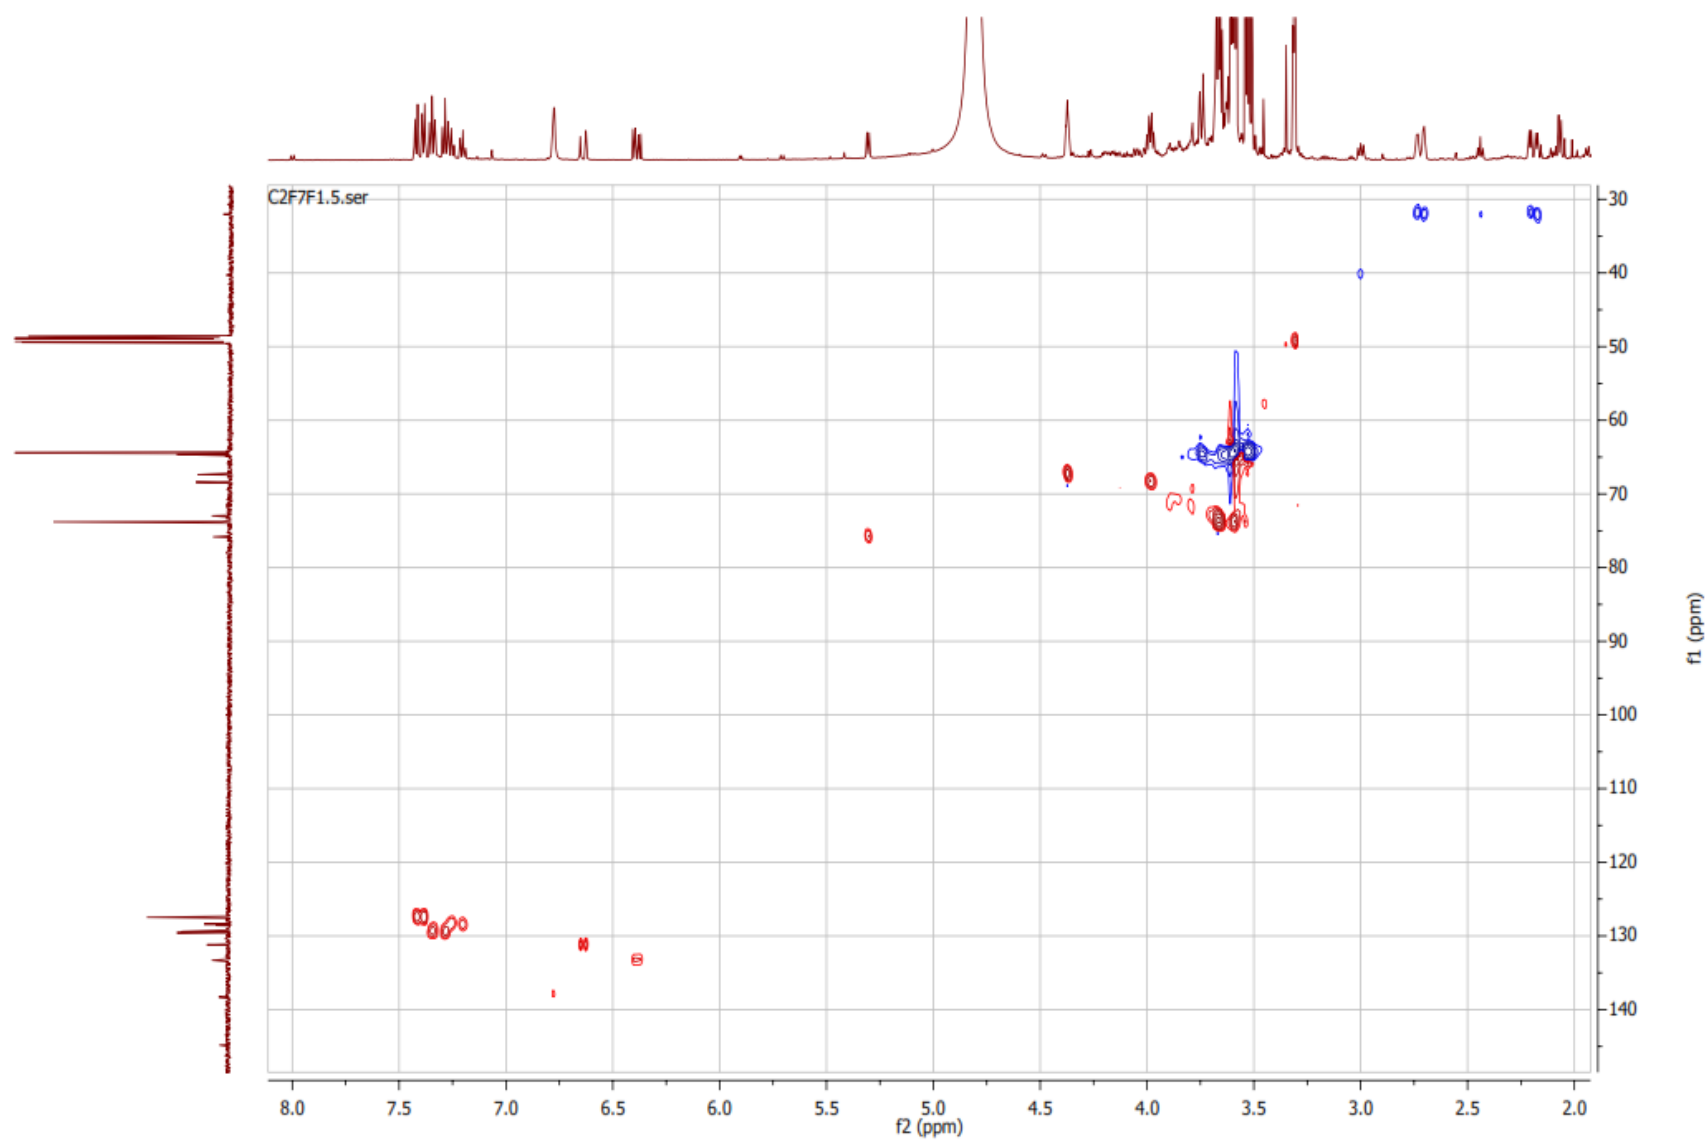

Figure S12.  $^1\text{H}$ - $^{13}\text{C}$  (HSQC) NMR ( $\text{CD}_3\text{OD}$ , 600 MHz) of the mixture of compounds (6-8).

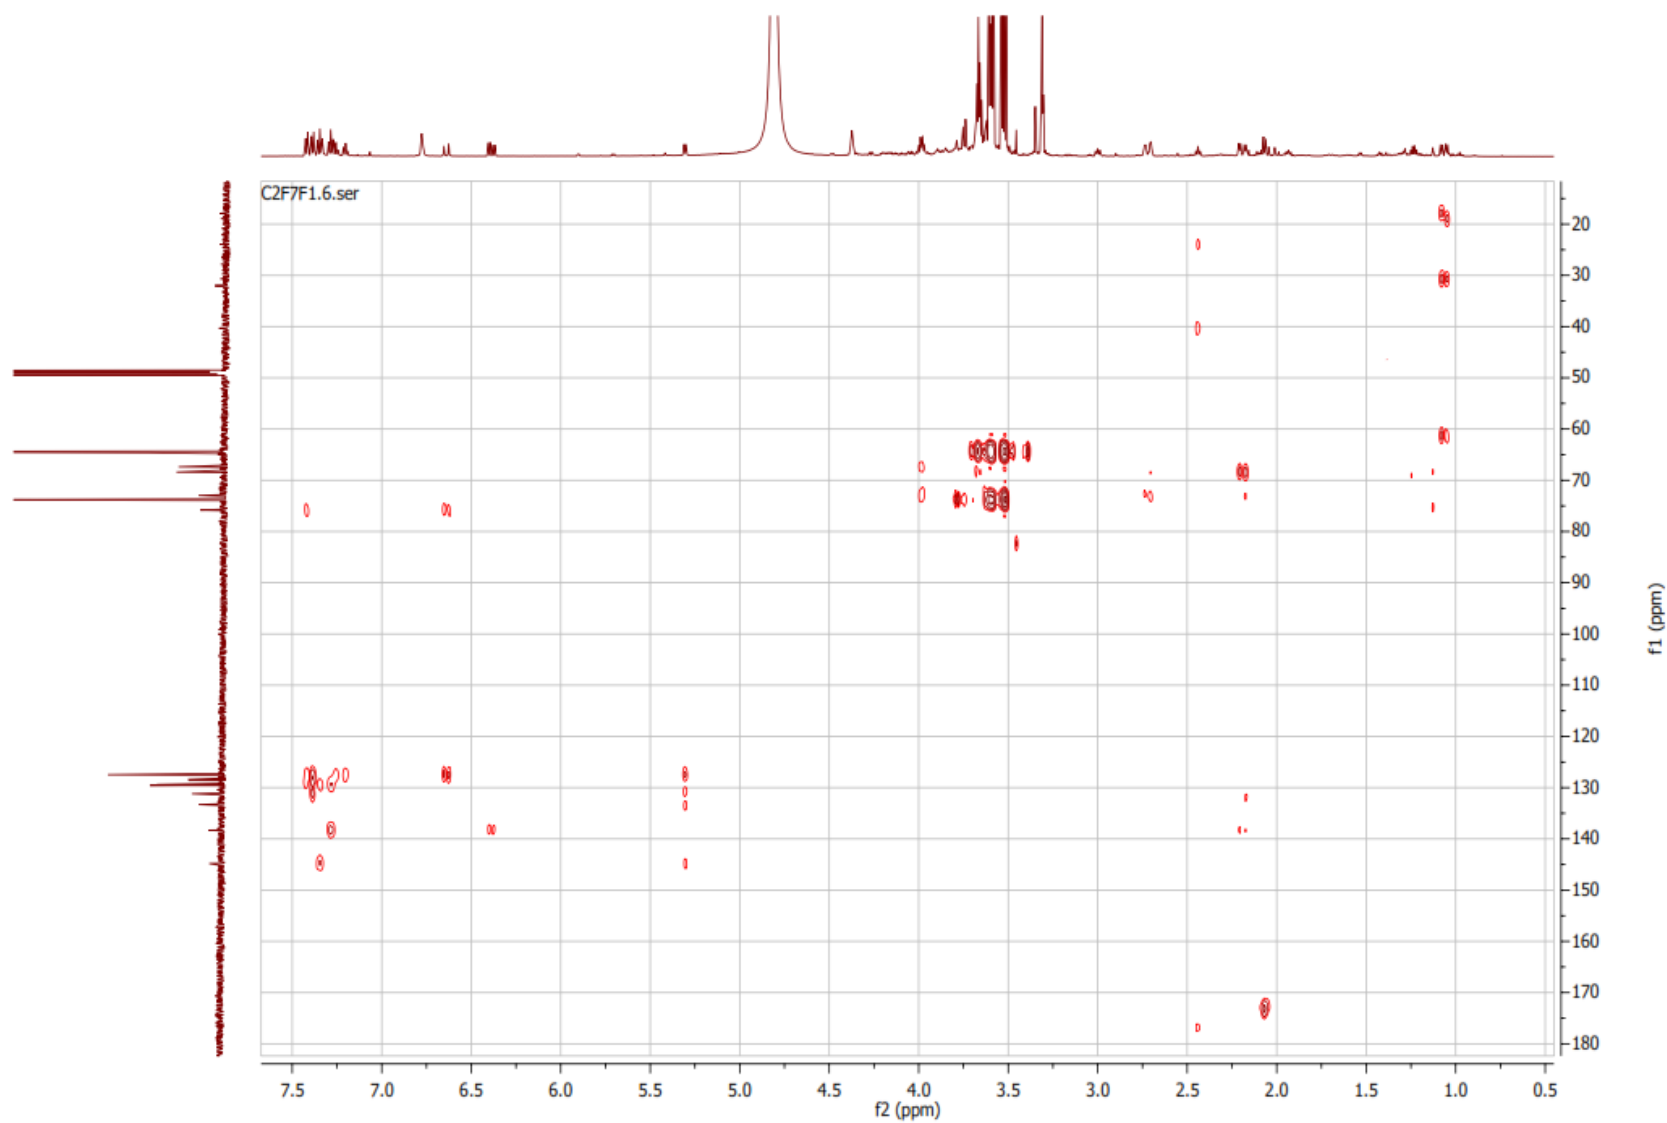

Figure S13.  $^1\text{H}$ - $^{13}\text{C}$  (HMBC) NMR ( $\text{CD}_3\text{OD}$ , 600 MHz) of the mixture of compounds (**6-8**).
